# Supplementary material for: Assembly of a planar, tricyclic B4N8 framework with s-indacene structure
Source: Royal Society of Chemistry journal article supplement (doi:10.1039/b709270a), 2007-01-01
Supplement: b709270a.pdf [file b709270a.pdf]

# Assembly of a Planar, Tricyclic B<sub>4</sub>N<sub>8</sub> Framework With *s*-Indacene Structure

Hanh V. Ly, Heikki M. Tuononen, Masood Parvez and Roland Roesler\*

– Supplementary Information –

| Topic                                                                                                | Page |
|------------------------------------------------------------------------------------------------------|------|
| <sup>1</sup> H, <sup>13</sup> C and <sup>11</sup> B NMR spectra for <b>2</b> , <b>3</b> and <b>4</b> | 2    |
| Cyclic Voltammetry for <b>4</b>                                                                      | 8    |
| Representations of the Kohn-Sham orbitals for <b>4</b> and [ <b>4</b> ] <sup>2+</sup>                | 10   |
| Optimized coordinates of the Kohn-Sham orbitals for <b>4</b> and [ <b>4</b> ] <sup>2+</sup>          | 15   |

$^1\text{H}$  and  $^{11}\text{B}$  NMR Spectra of 1,2-dimethyl-3,5-diphenyl-4-methylamino-1,2,4-triaza-3,5-diborolidine (**2**) in  $\text{C}_6\text{D}_6$

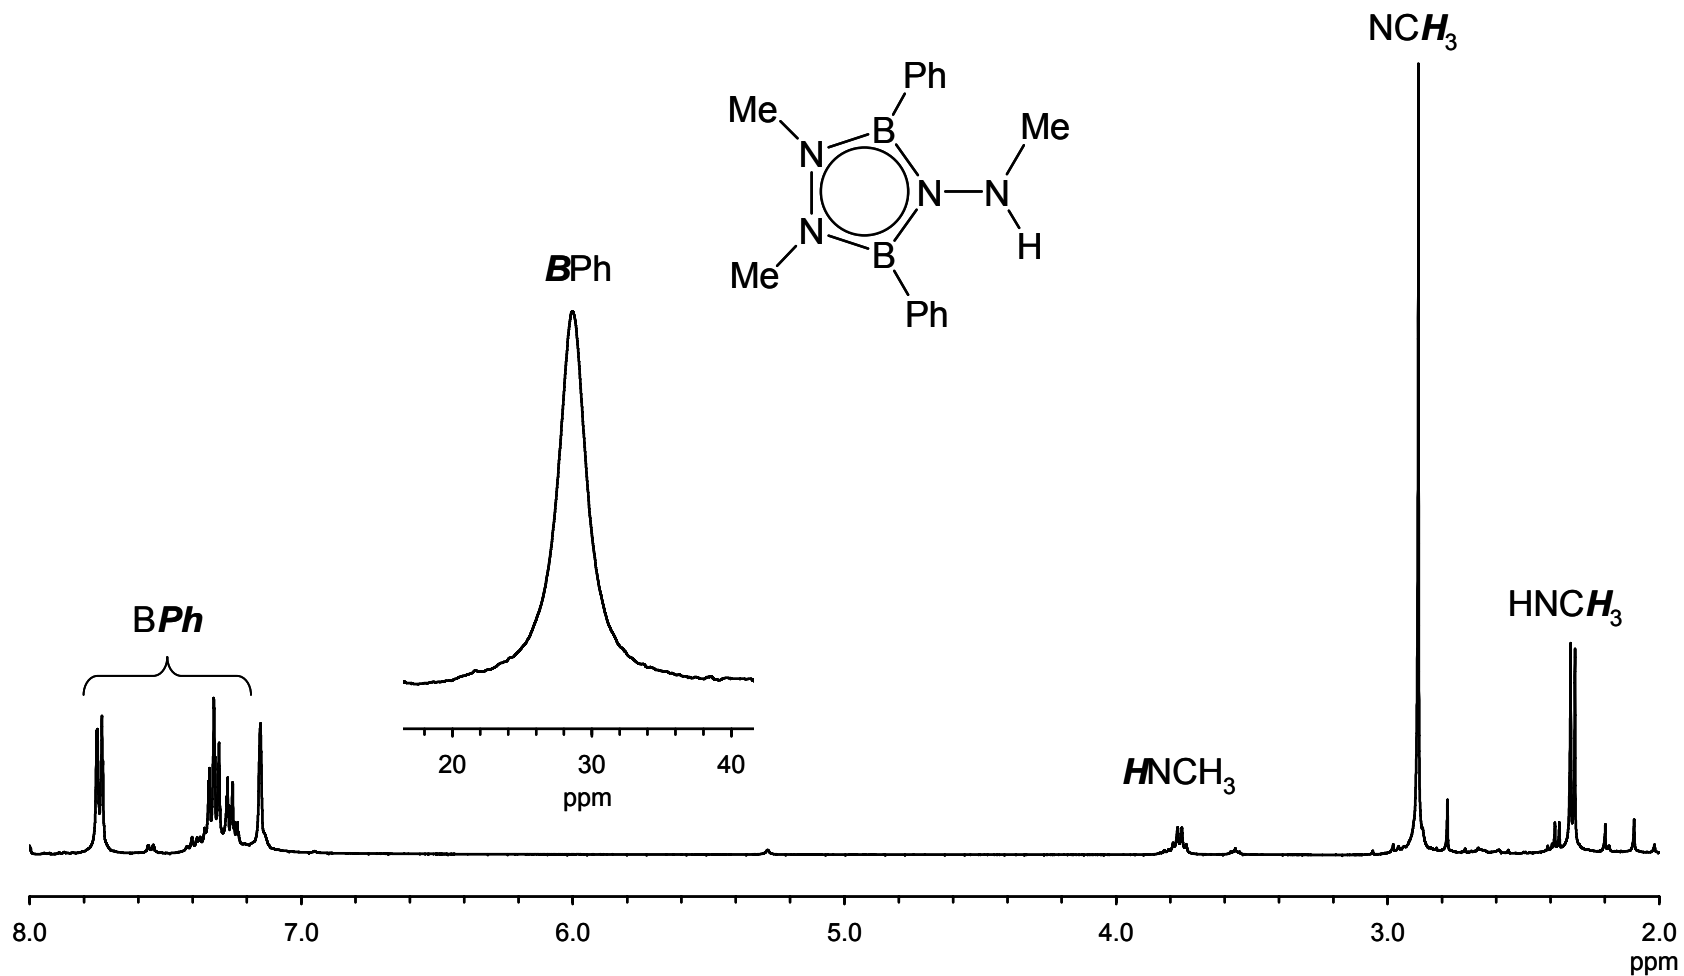

$^{13}\text{C}$  NMR Spectrum of 1,2-dimethyl-3,5-diphenyl-4-methylamino-1,2,4-triaza-3,5-diborolidine (**2**) in  $\text{C}_6\text{D}_6$

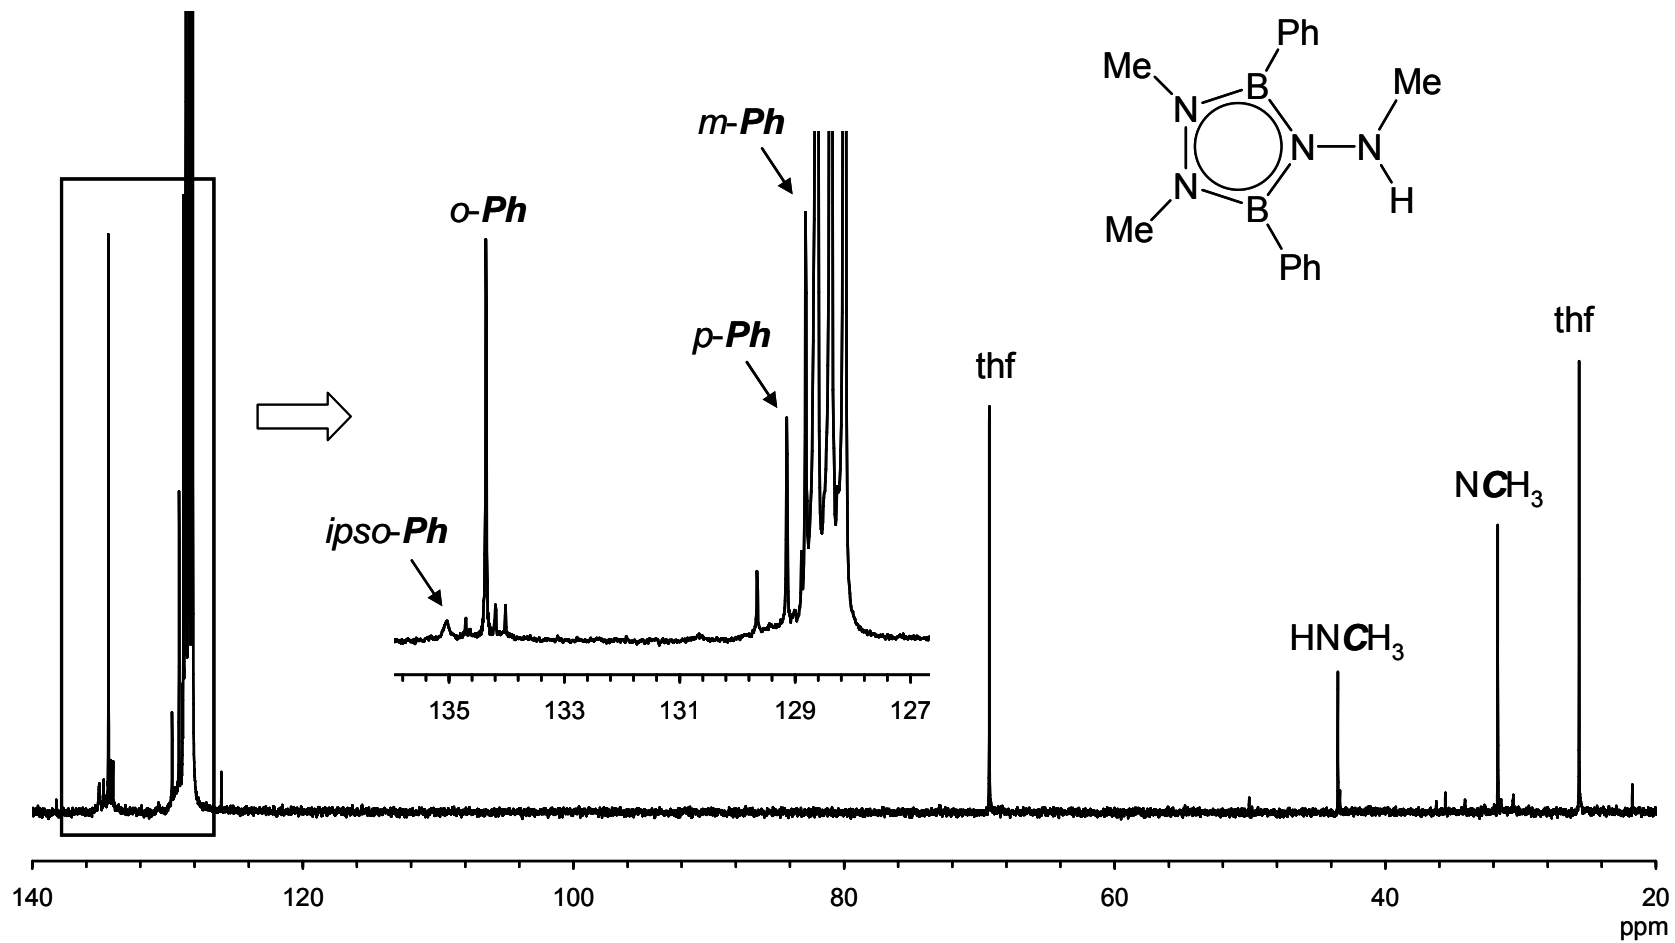

$^1\text{H}$  and  $^{11}\text{B}$  NMR Spectra of the dilithium salt (**3**) in THF- $d_8$

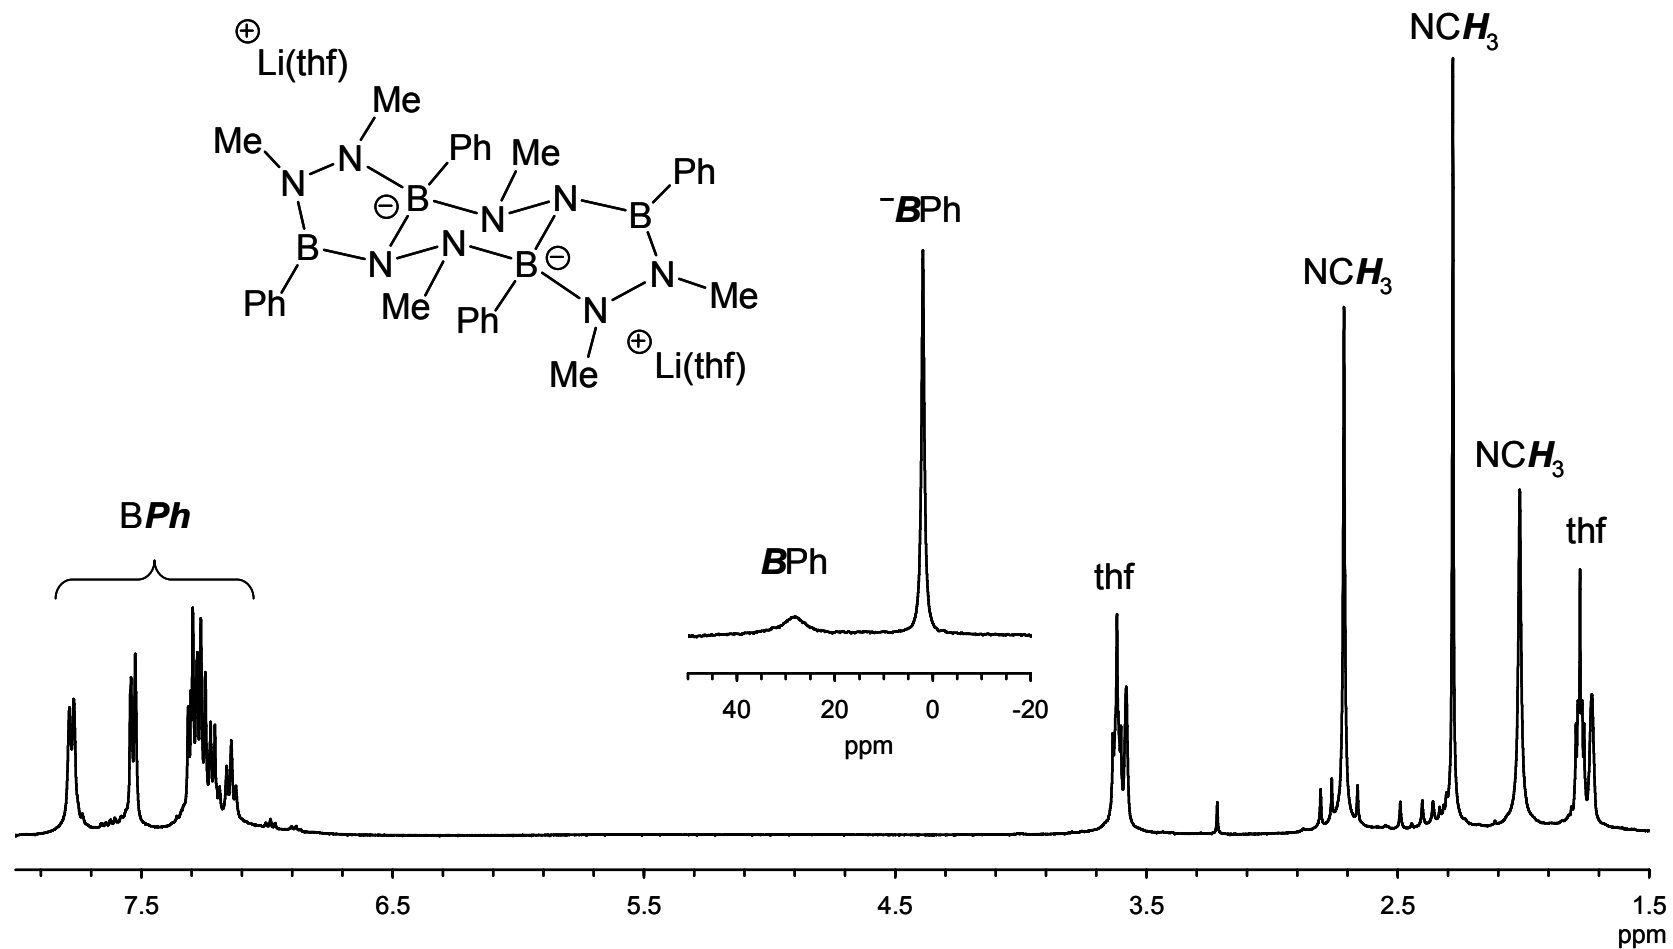

$^{13}\text{C}$  and  $^7\text{Li}$  NMR Spectra of the dilithium salt (**3**) in THF- $d_8$

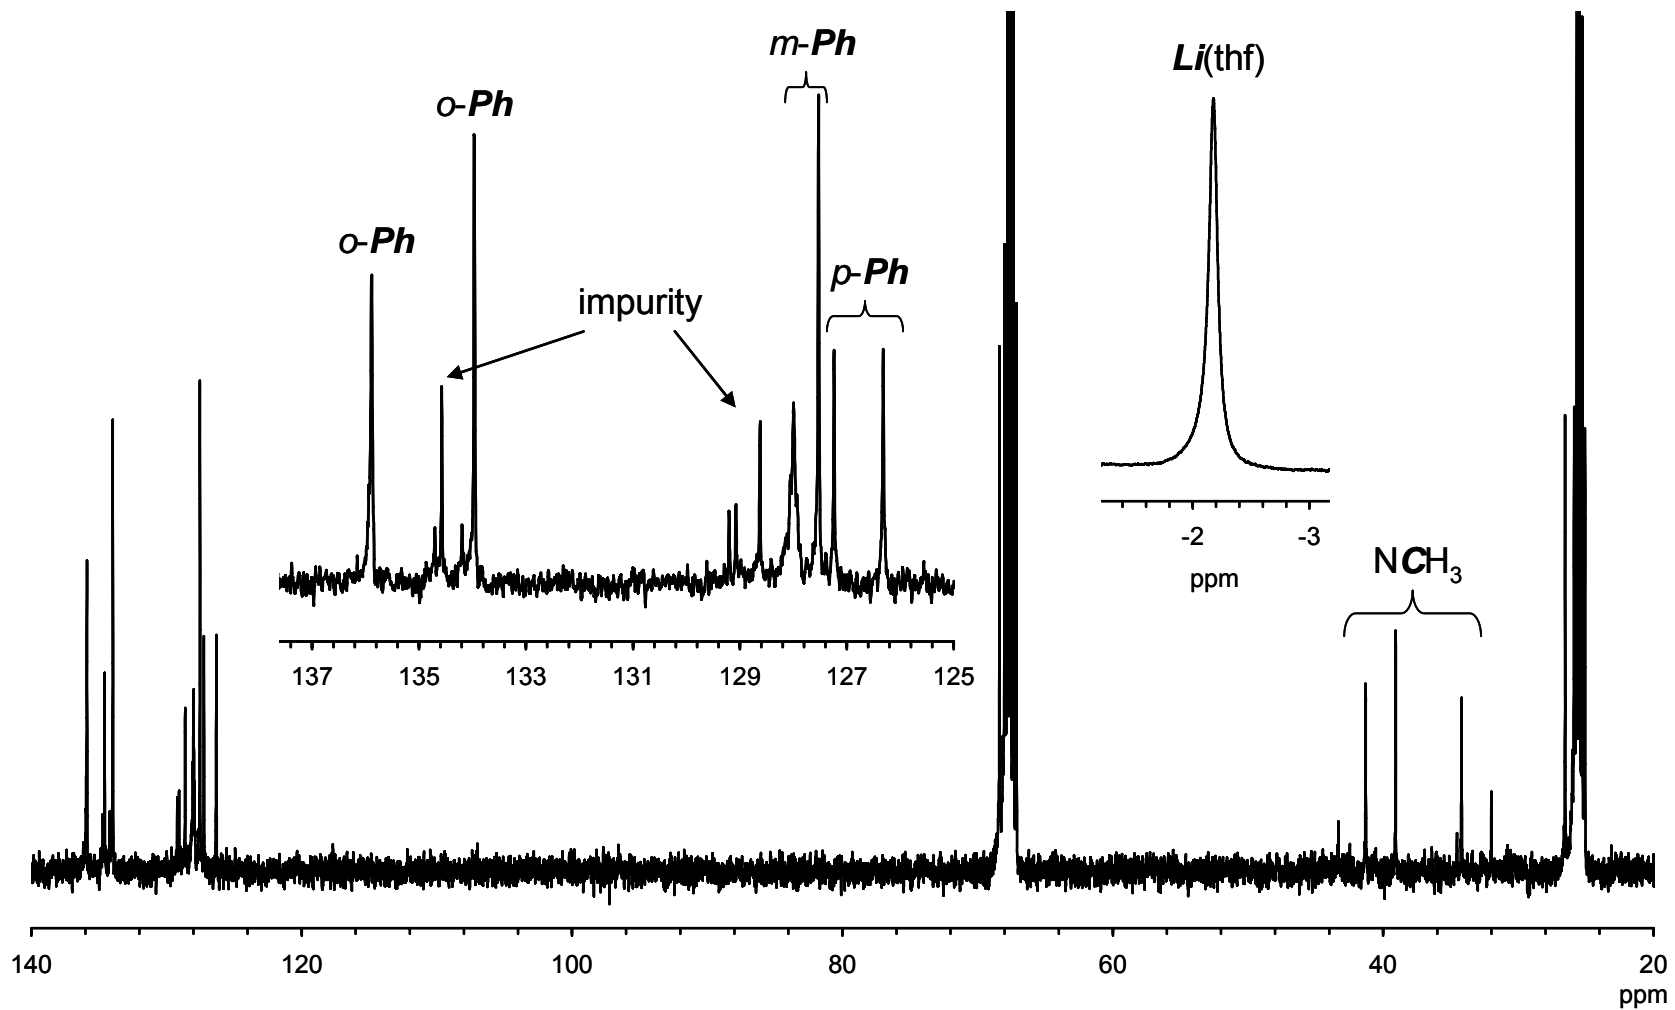

$^1\text{H}$  and  $^{11}\text{B}$  NMR Spectra of the tricyclic tetrahydrazidotetraborane (**4**) in  $\text{THF-d}_8$

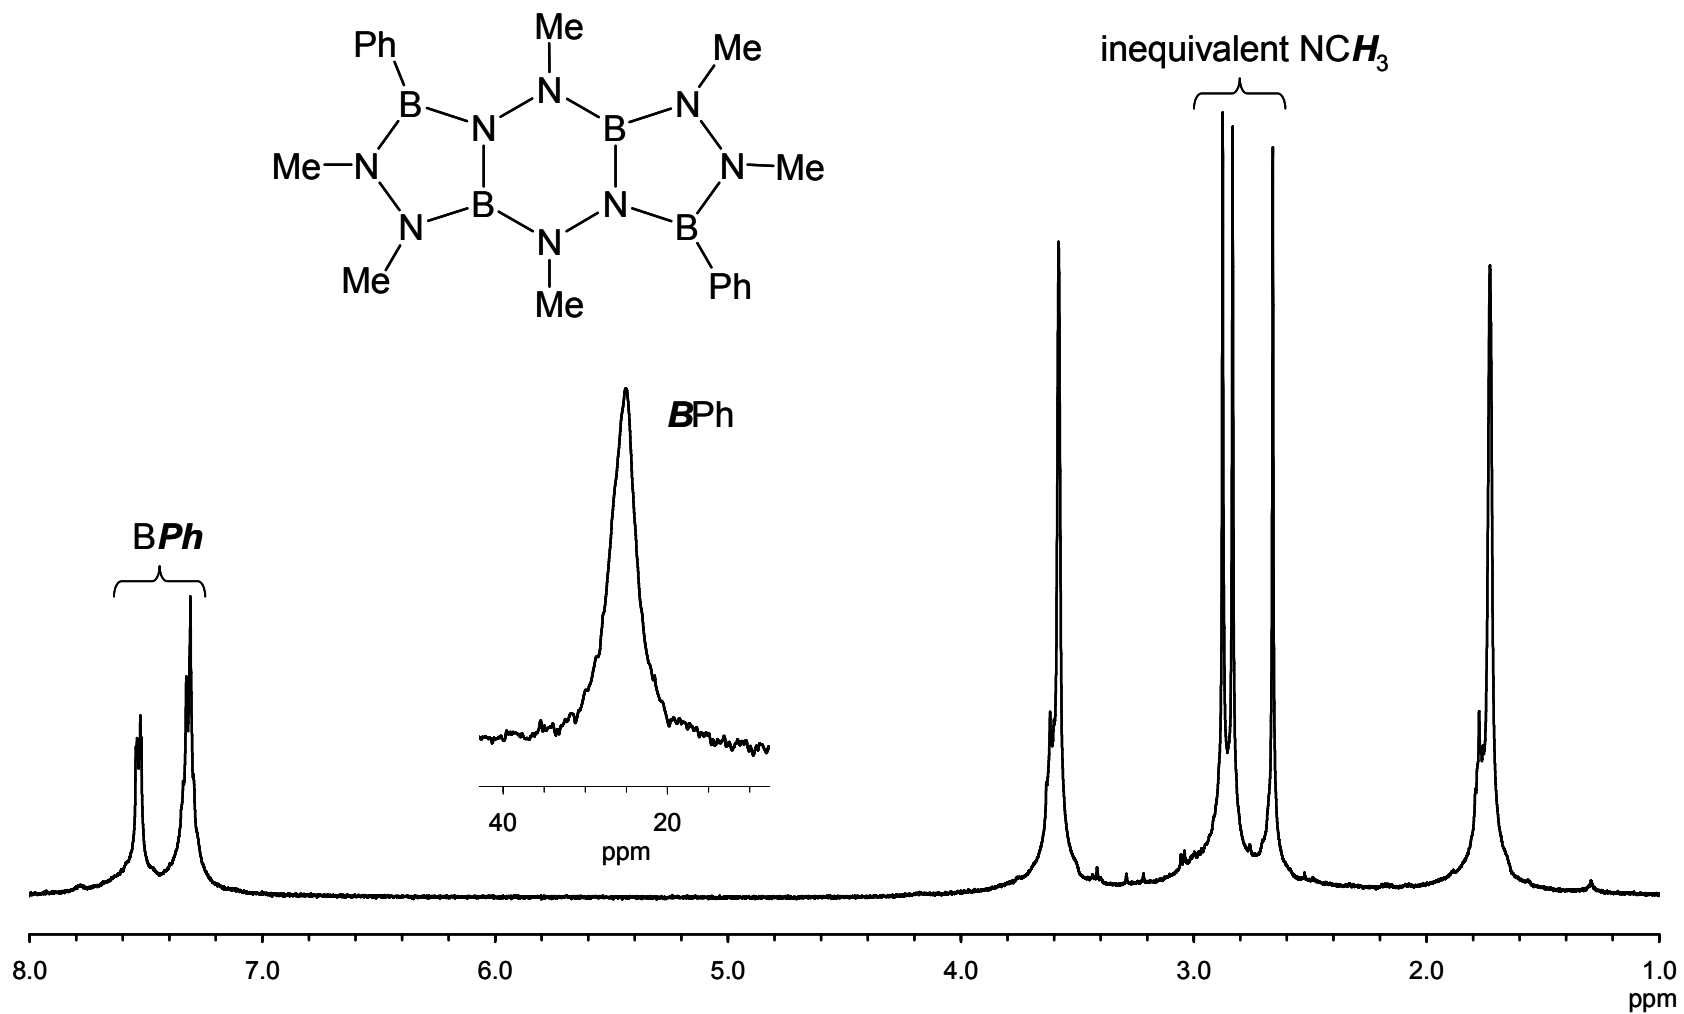

$^{13}\text{C}$  NMR Spectrum of the tricyclic tetrahydrazidotetraborane (**4**) in THF- $d_8$

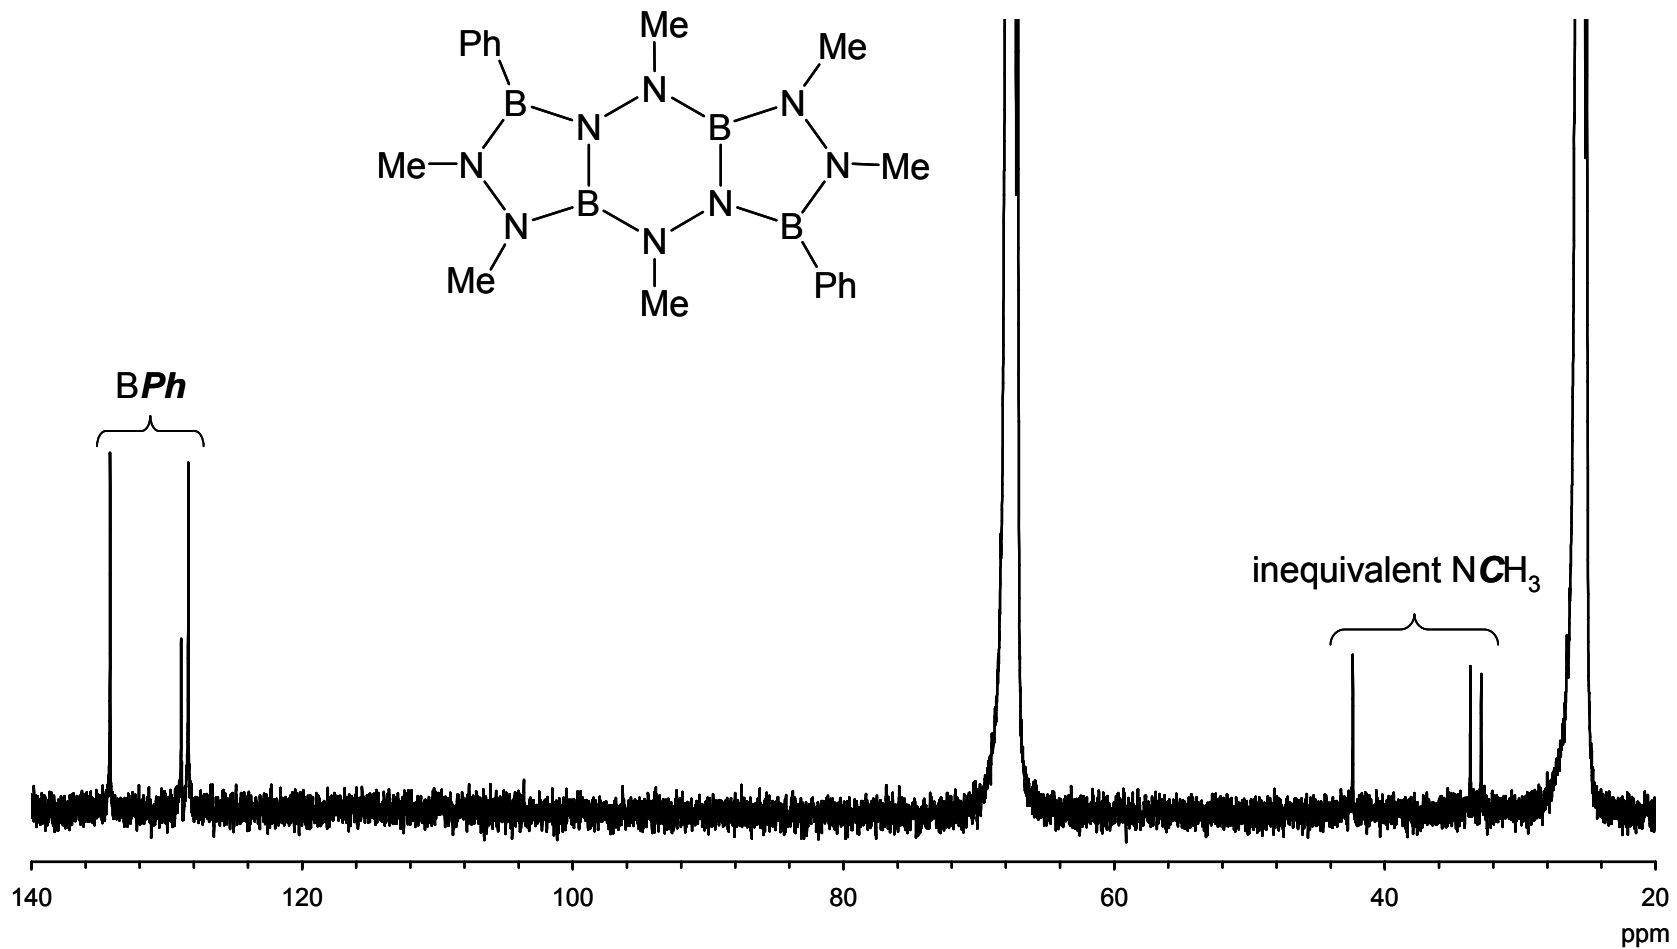

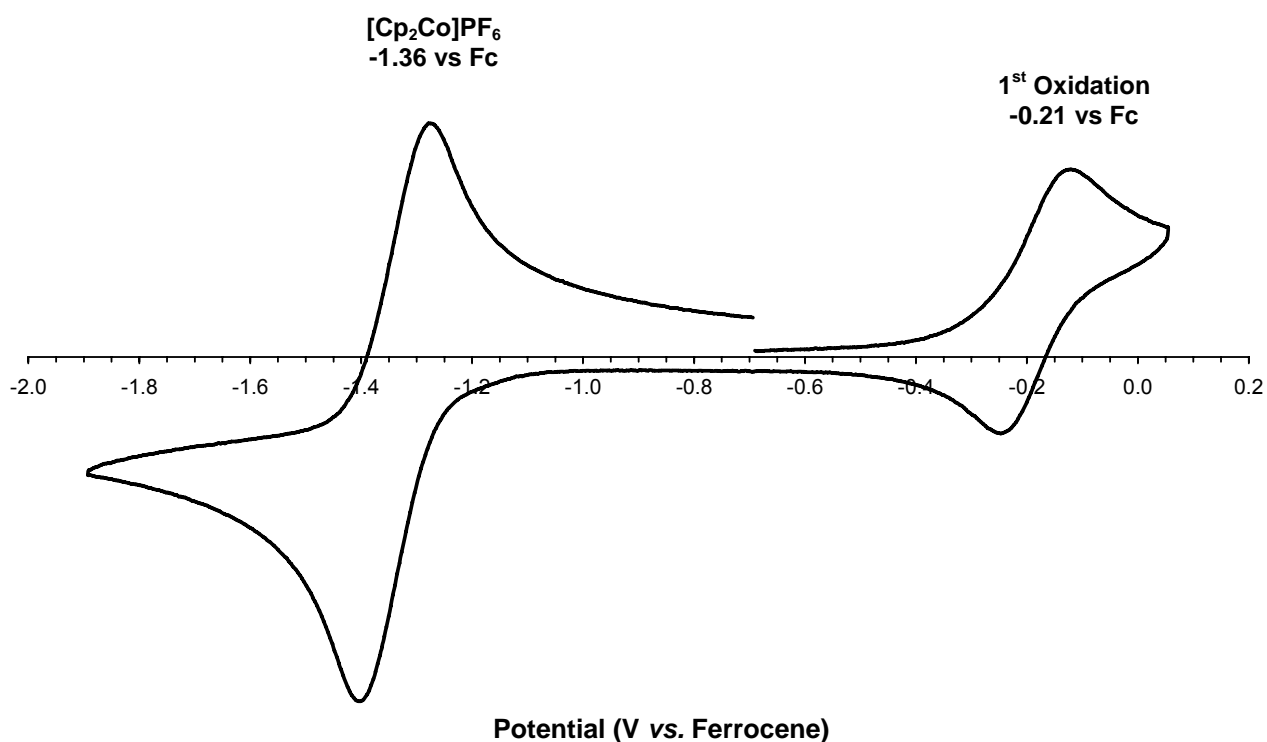

**Fig. S1** Cyclic voltammogram of **4** in the presence of the internal standard [Cp<sub>2</sub>Co]PF<sub>6</sub> ([Cp<sub>2</sub>Co]<sup>0/+1</sup> with E<sup>0</sup> = -1.36 V vs. ferrocene and -0.82 V vs. the SCE) at 200 ms scan rate. The measurements were performed in THF at an analyte concentration of 1 mM, and using 0.1 M [nBu<sub>4</sub>N]PF<sub>6</sub> as a supporting electrolyte.



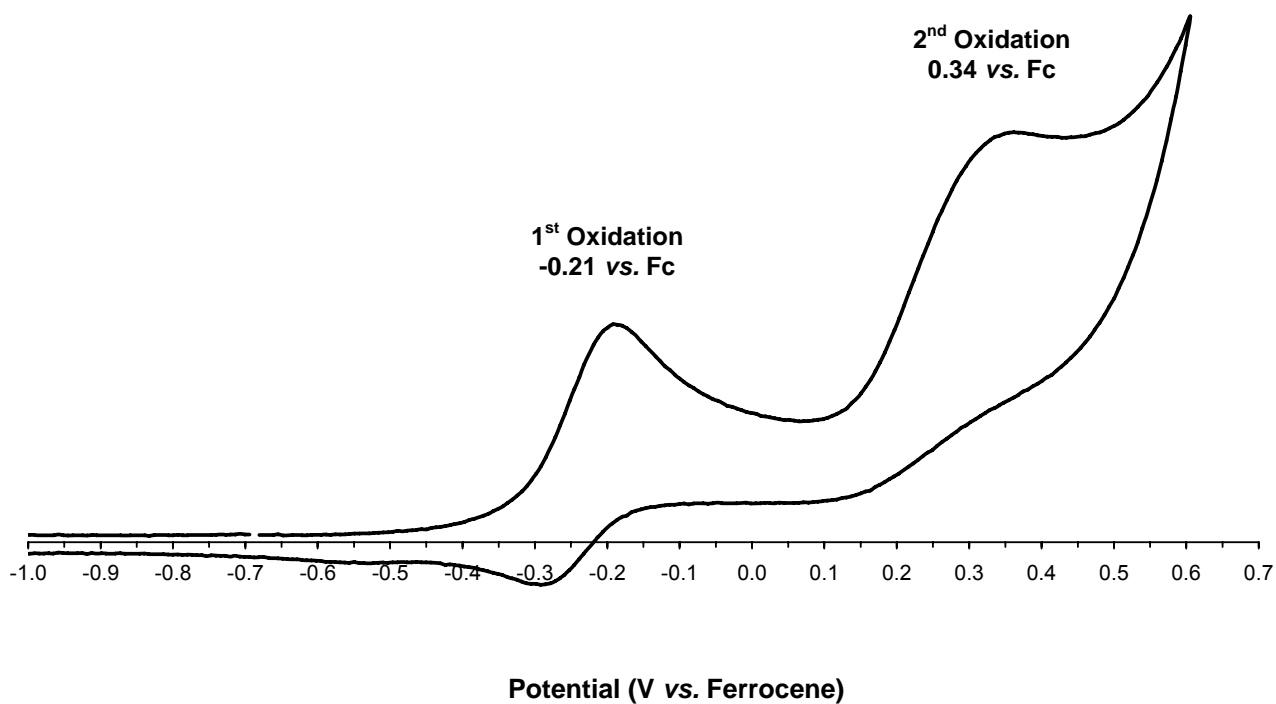

**Fig. S2** Cyclic voltammogram of **4** in the absence of the internal standard at 50 ms scan rate. The measurements were performed in THF at an analyte concentration of 1 mM, and using 0.1 M  $[n\text{Bu}_4\text{N}]\text{PF}_6$  as a supporting electrolyte.

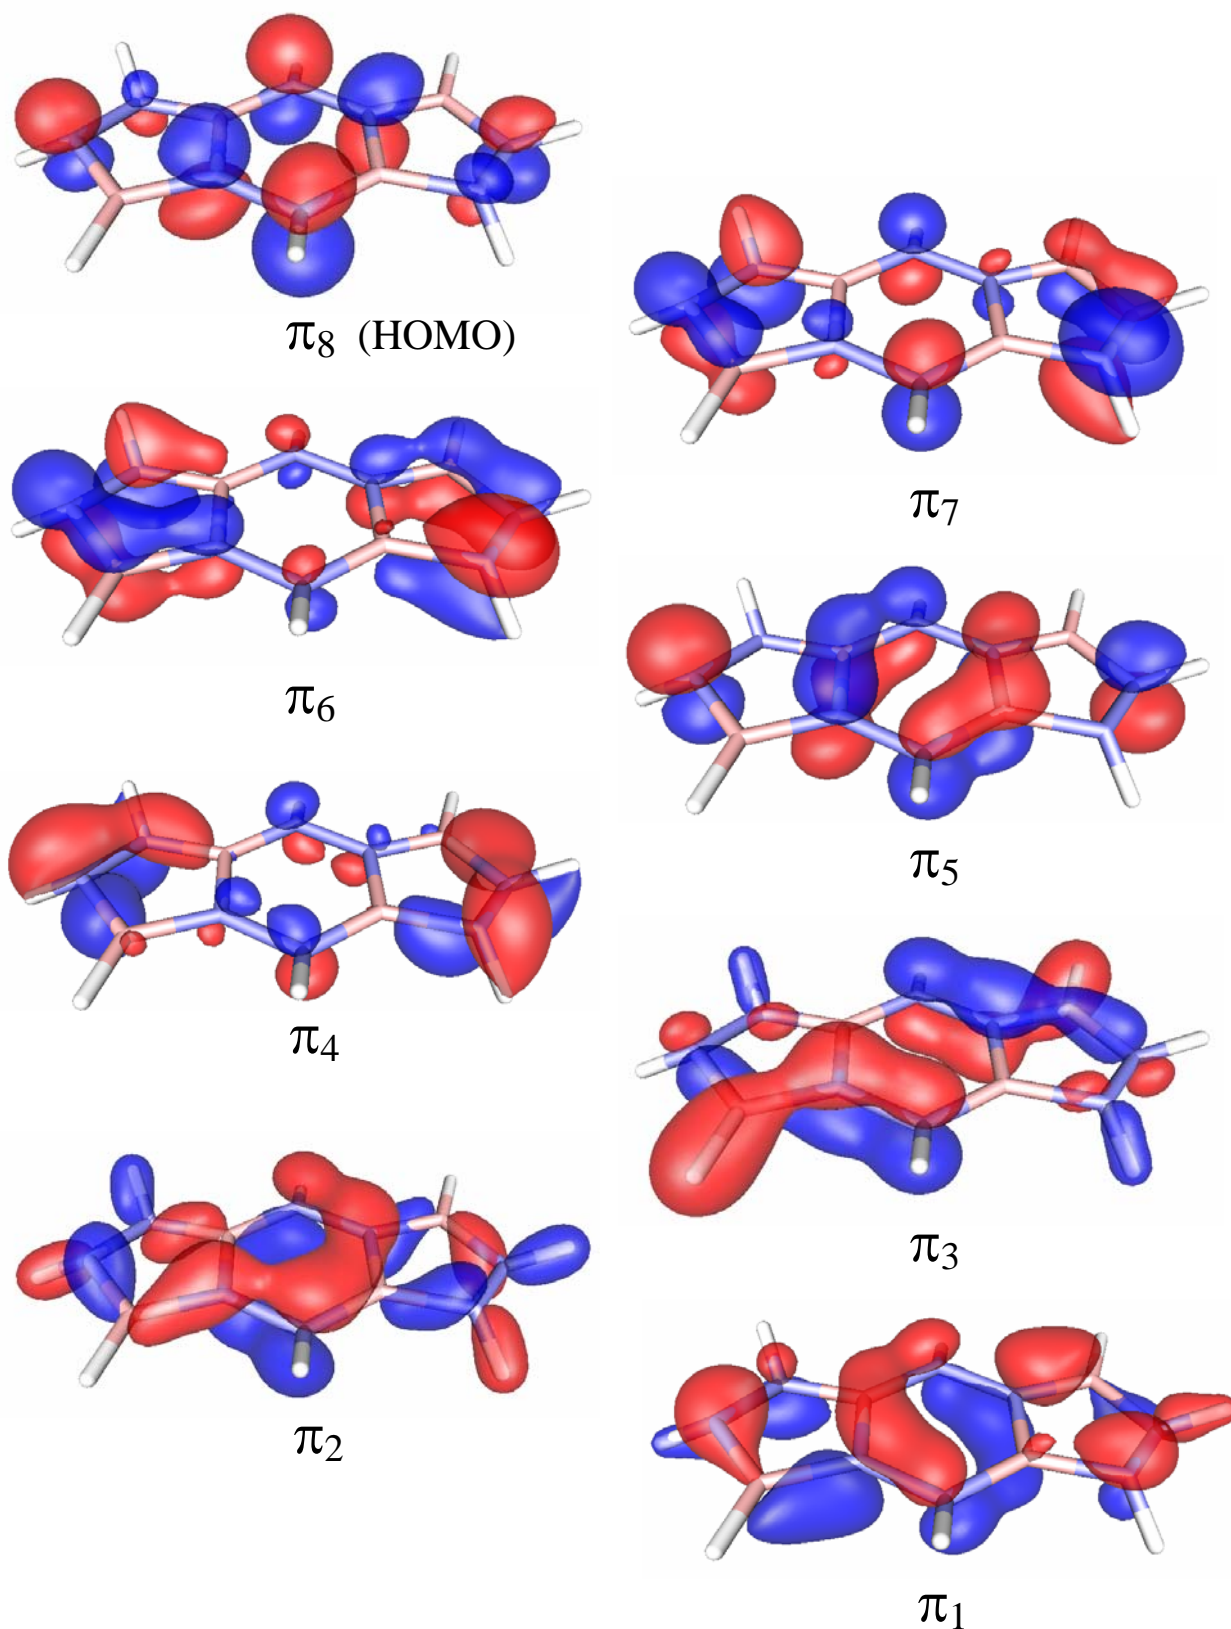

**Fig. S3** Occupied  $\pi$ -like Kohn-Sham orbitals of **4**. For simplicity, orbitals are shown for a structure in which Me and Ph substituents attached to nitrogen and boron atoms have been replaced with hydrogen atoms.

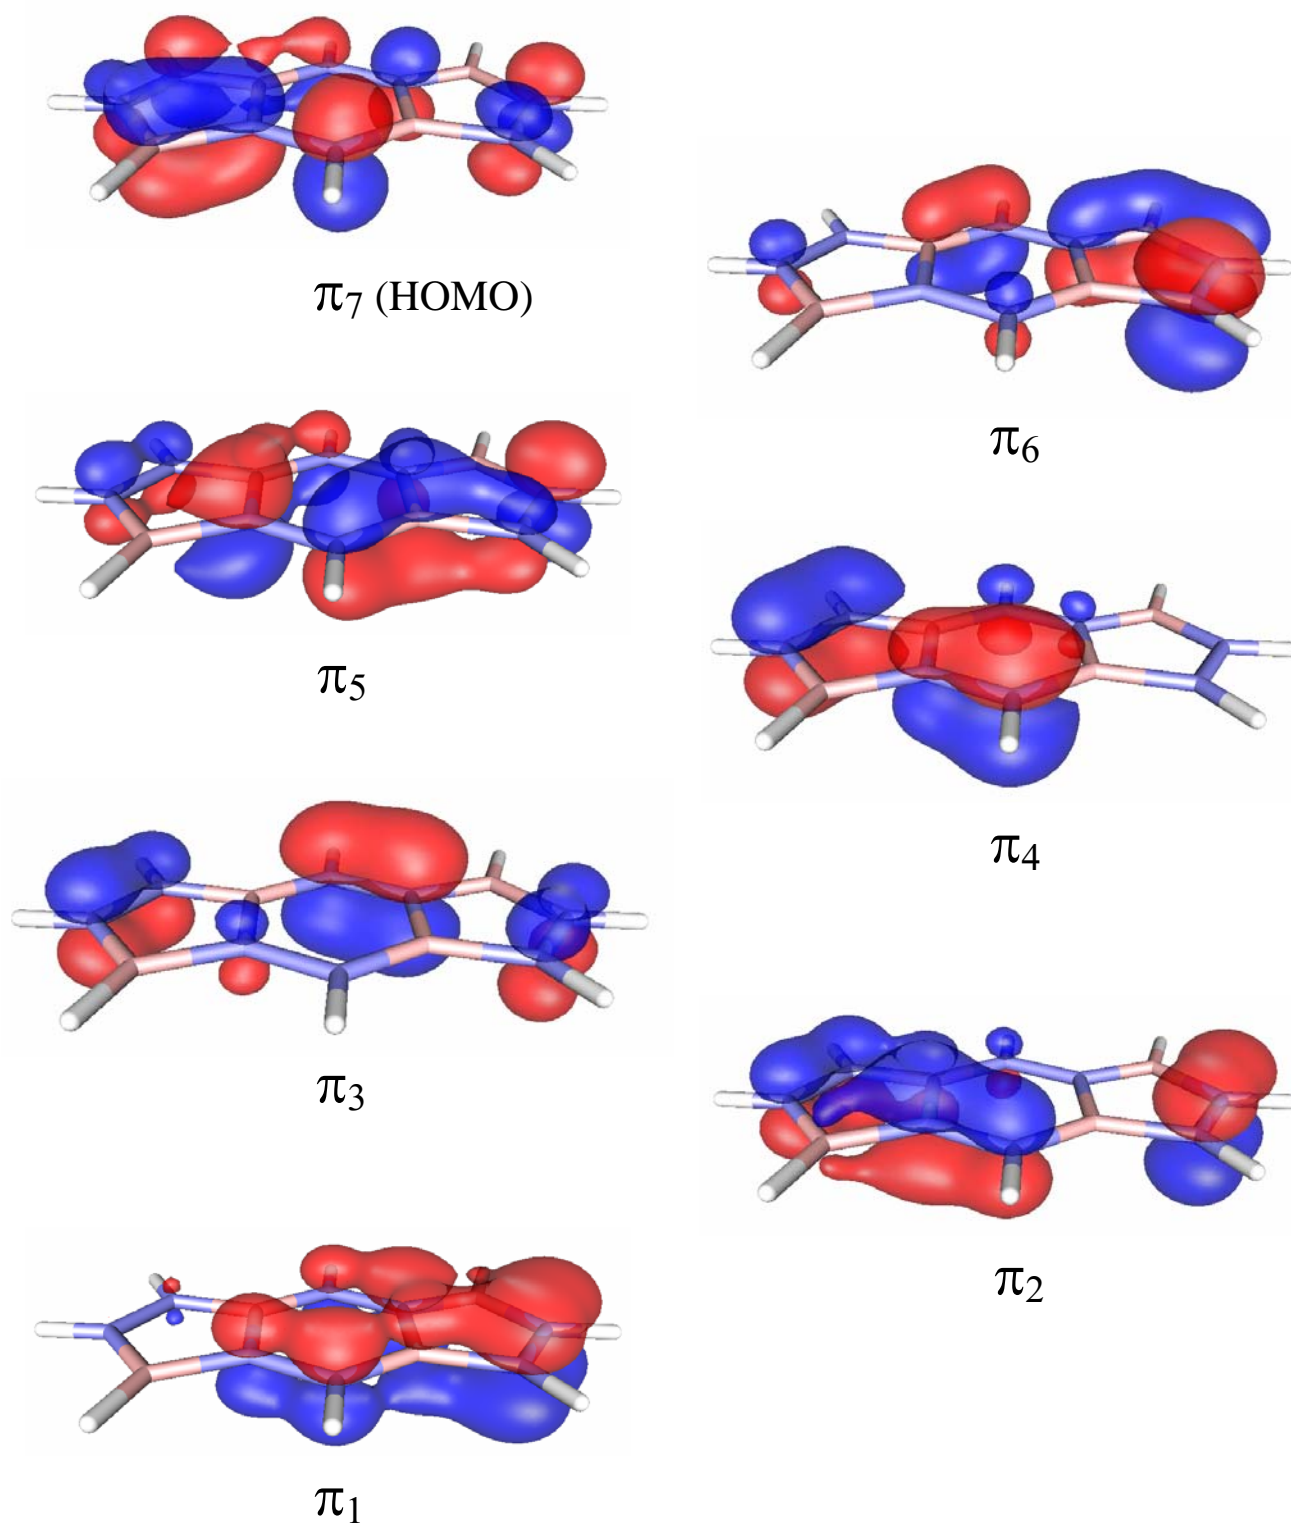

**Fig. S4** Occupied  $\pi$ -symmetric Kohn-Sham  $\alpha$ -orbitals of open-shell singlet  $[4]^{2+}$ . For simplicity, orbitals are shown for a structure in which Me and Ph substituents attached to nitrogen and boron atoms have been replaced with hydrogen atoms.

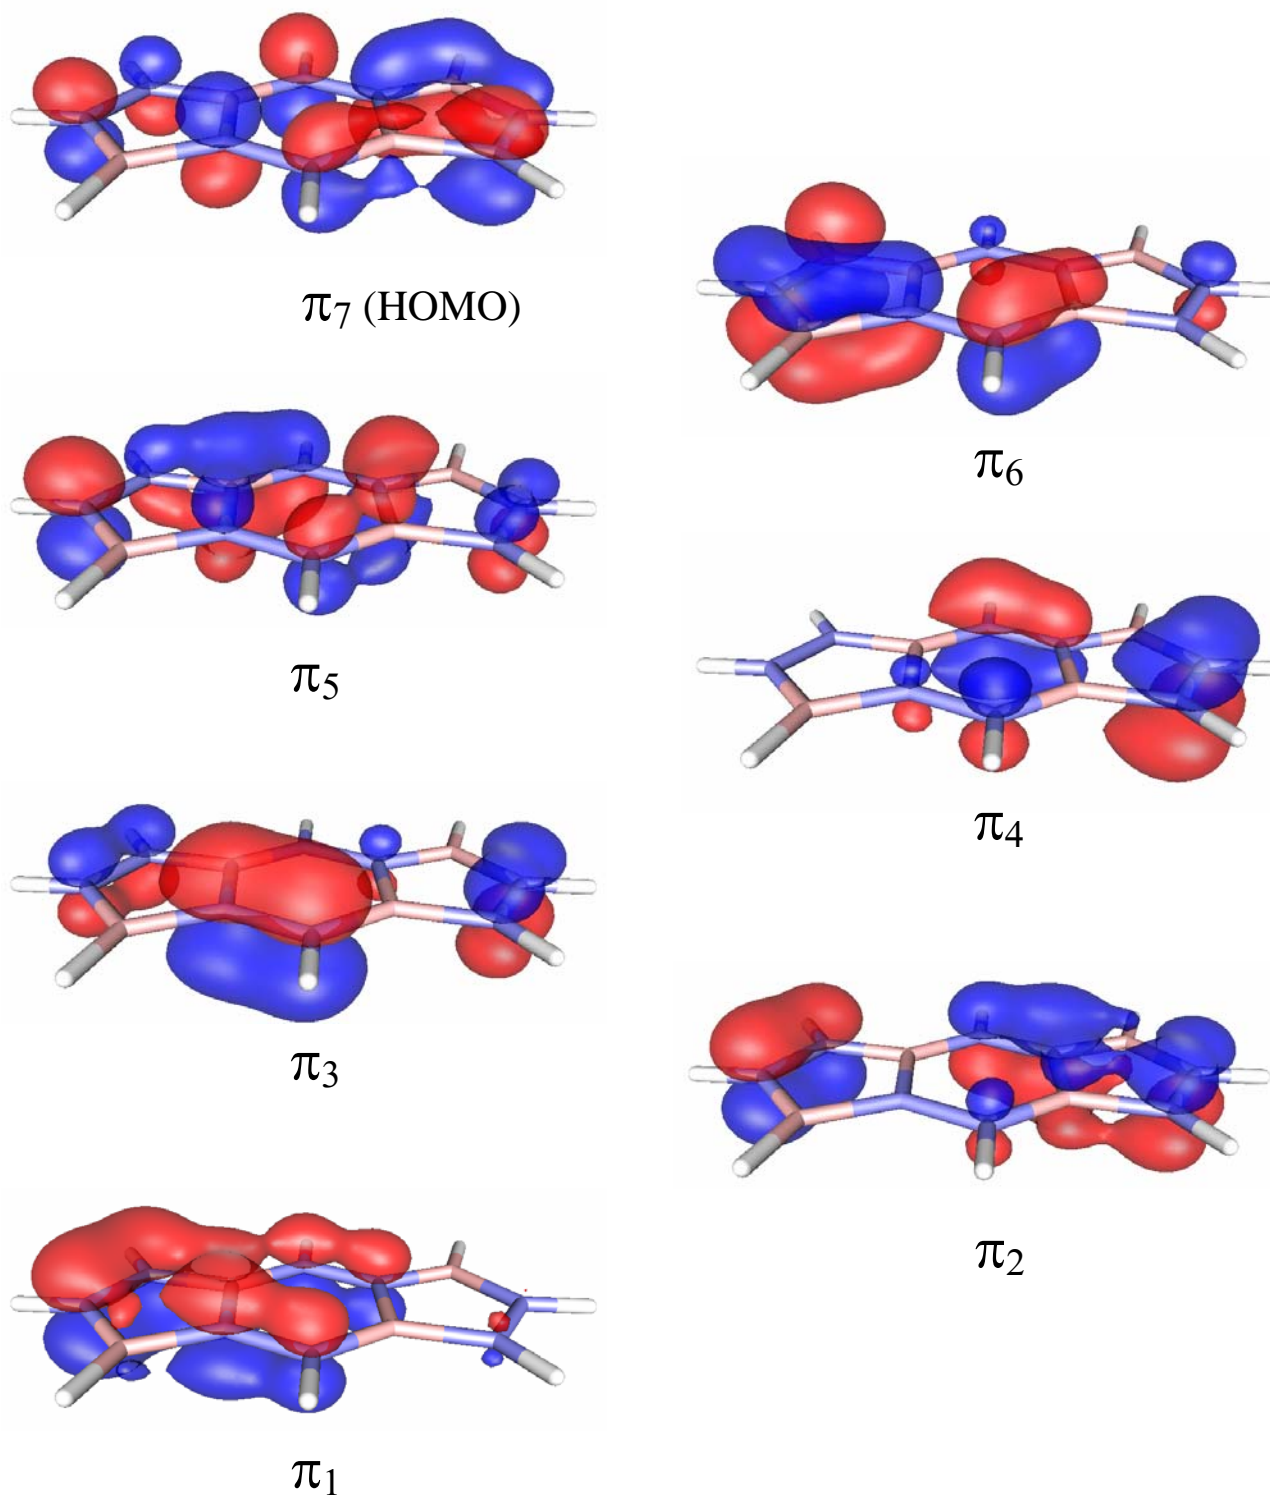

**Fig. S5** Occupied  $\pi$ -symmetric Kohn-Sham  $\beta$ -orbitals of open-shell singlet  $[4]^{2+}$ . For simplicity, orbitals are shown for a structure in which Me and Ph substituents attached to nitrogen and boron atoms have been replaced with hydrogen atoms.



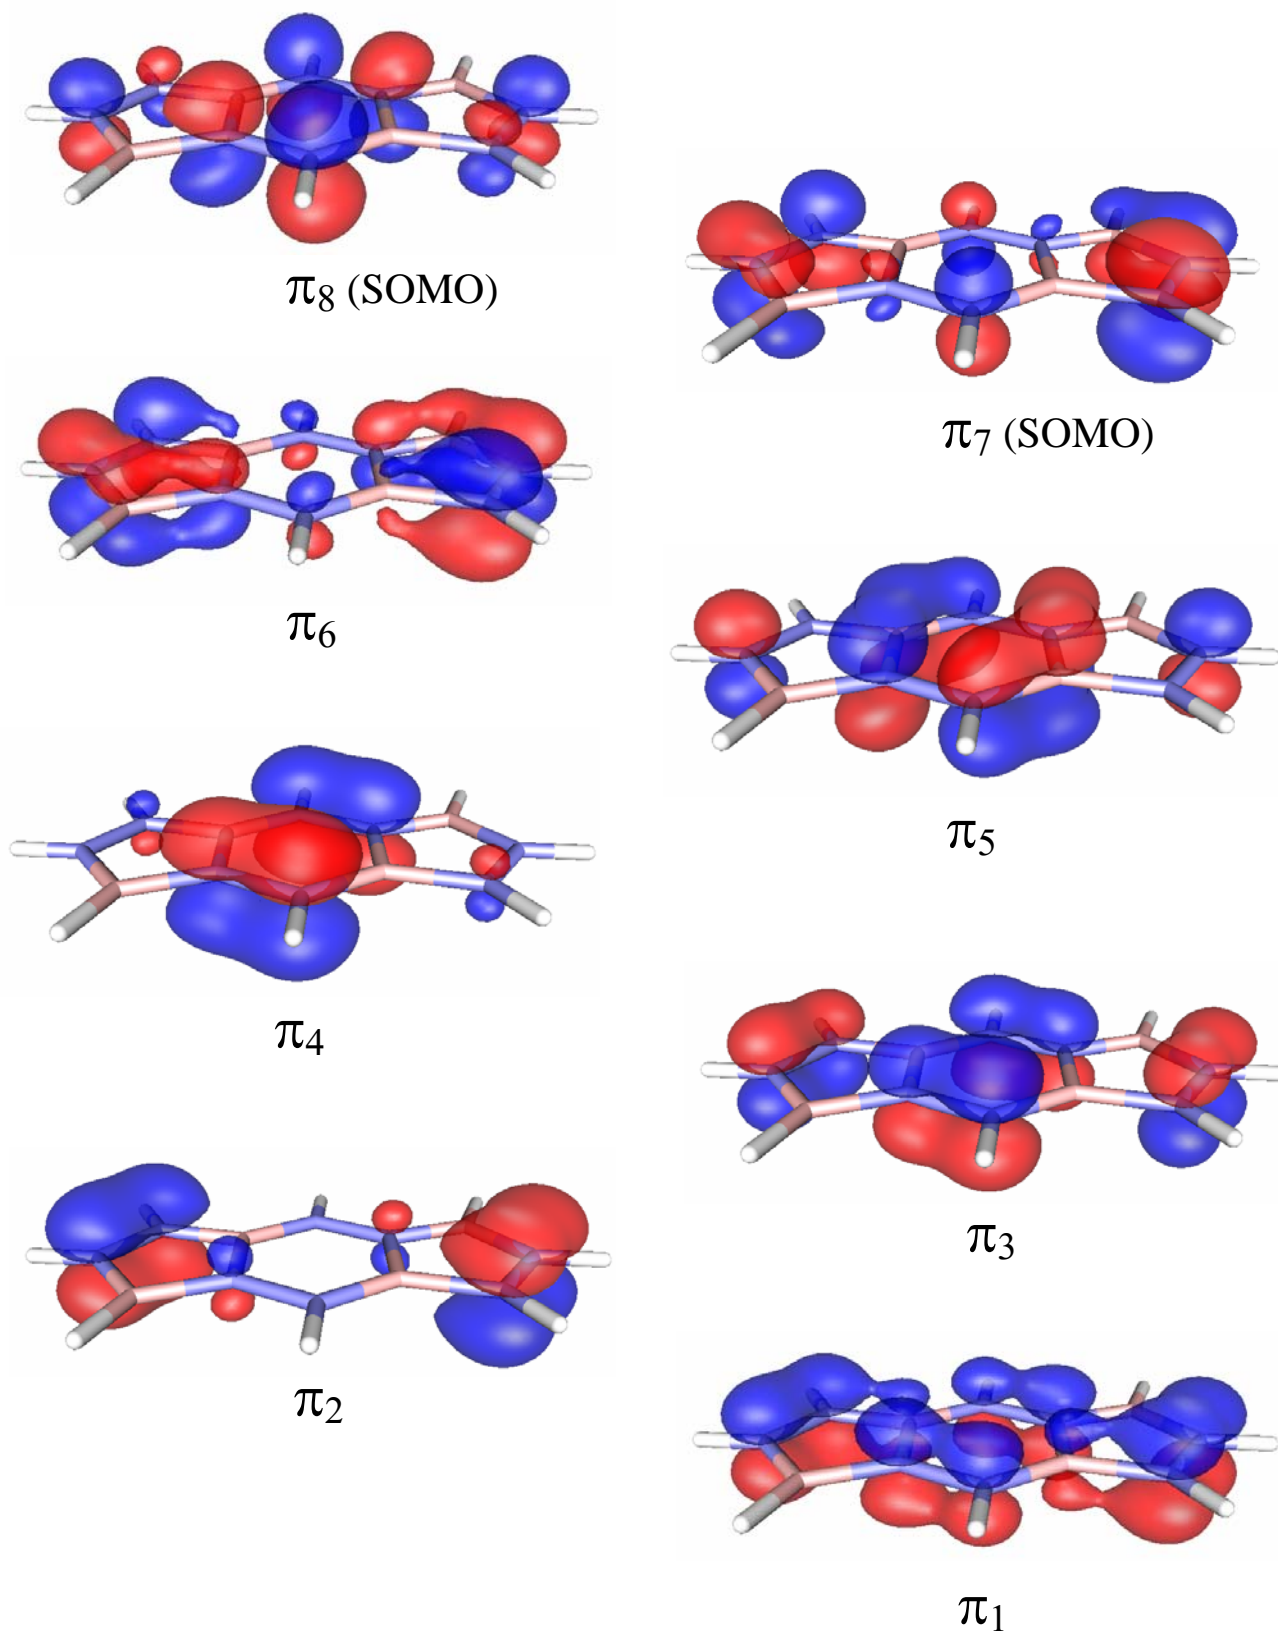

**Fig. S6** Occupied  $\pi$ -symmetric Kohn-Sham  $\alpha$ -orbitals of triplet  $[4]^{2+}$ . For simplicity, orbitals are shown for a structure in which Me and Ph substituents attached to nitrogen and boron atoms have been replaced with hydrogen atoms.

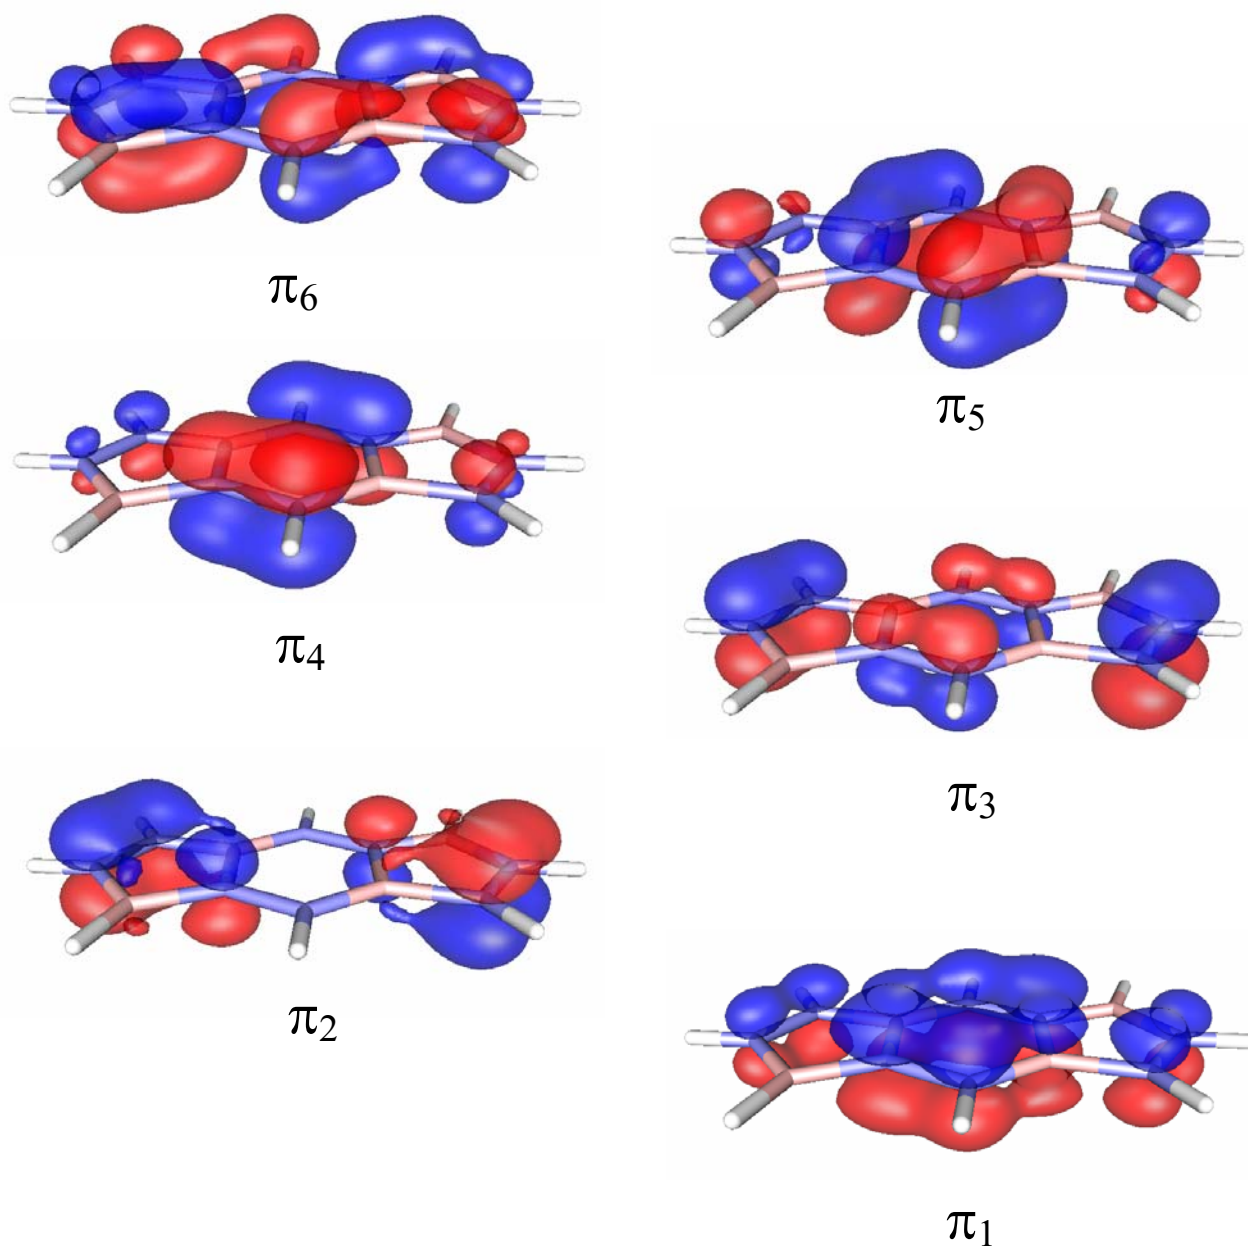

**Fig. S7** Occupied  $\pi$ -symmetric Kohn-Sham  $\beta$ -orbitals of triplet  $[4]^{2+}$ . For simplicity, orbitals are shown for a structure in which Me and Ph substituents attached to nitrogen and boron atoms have been replaced with hydrogen atoms.

Optimized coordinates of **4** and **[4]<sup>2+</sup>** in mol2 format:

@<TRIPOS>MOLECULE

Singlet **4**

58 62 1

SMALL

NO\_CHARGES

\*\*\*\*

\*\*\*\*

@<TRIPOS>ATOM

|    |   |         |         |         |       |   |      |        |
|----|---|---------|---------|---------|-------|---|------|--------|
| 1  | C | 1.7111  | 1.9377  | -1.1476 | C.3   | 1 | RES1 | 0.0000 |
| 2  | N | 0.9526  | 1.1366  | -0.2110 | N.3   | 1 | RES1 | 0.0000 |
| 3  | N | 1.3838  | -0.2018 | -0.0972 | N.pl3 | 1 | RES1 | 0.0000 |
| 4  | B | 0.4622  | -1.2928 | 0.0852  | B     | 1 | RES1 | 0.0000 |
| 5  | N | -0.9526 | -1.1366 | 0.2110  | N.3   | 1 | RES1 | 0.0000 |
| 6  | C | -1.7111 | -1.9377 | 1.1476  | C.3   | 1 | RES1 | 0.0000 |
| 7  | B | -0.4622 | 1.2928  | -0.0852 | B     | 1 | RES1 | 0.0000 |
| 8  | N | -1.2209 | 2.5106  | -0.1506 | N.3   | 1 | RES1 | 0.0000 |
| 9  | C | -0.8248 | 3.7557  | 0.4627  | C.3   | 1 | RES1 | 0.0000 |
| 10 | N | -1.3838 | 0.2018  | 0.0972  | N.pl3 | 1 | RES1 | 0.0000 |
| 11 | B | -2.7152 | 0.7394  | 0.0786  | B     | 1 | RES1 | 0.0000 |
| 12 | N | -2.5836 | 2.1629  | 0.0170  | N.3   | 1 | RES1 | 0.0000 |
| 13 | C | -3.5287 | 3.0878  | -0.5534 | C.3   | 1 | RES1 | 0.0000 |
| 14 | B | 2.7152  | -0.7394 | -0.0786 | B     | 1 | RES1 | 0.0000 |
| 15 | N | 2.5836  | -2.1629 | -0.0170 | N.3   | 1 | RES1 | 0.0000 |
| 16 | C | 3.5287  | -3.0878 | 0.5534  | C.3   | 1 | RES1 | 0.0000 |
| 17 | N | 1.2209  | -2.5106 | 0.1506  | N.3   | 1 | RES1 | 0.0000 |
| 18 | C | 0.8248  | -3.7557 | -0.4627 | C.3   | 1 | RES1 | 0.0000 |
| 19 | C | -4.0865 | -0.0115 | 0.0195  | C.2   | 1 | RES1 | 0.0000 |
| 20 | C | 4.0865  | 0.0115  | -0.0195 | C.2   | 1 | RES1 | 0.0000 |
| 21 | H | 4.5222  | -2.6442 | 0.4980  | H     | 1 | RES1 | 0.0000 |
| 22 | H | 3.2975  | -3.3008 | 1.6049  | H     | 1 | RES1 | 0.0000 |
| 23 | H | 3.5506  | -4.0353 | 0.0058  | H     | 1 | RES1 | 0.0000 |
| 24 | H | 1.2307  | -4.6199 | 0.0719  | H     | 1 | RES1 | 0.0000 |
| 25 | H | -0.2624 | -3.8284 | -0.4399 | H     | 1 | RES1 | 0.0000 |
| 26 | H | 1.1499  | -3.8101 | -1.5099 | H     | 1 | RES1 | 0.0000 |
| 27 | H | -1.1160 | -2.8080 | 1.4254  | H     | 1 | RES1 | 0.0000 |
| 28 | H | -1.9228 | -1.3639 | 2.0593  | H     | 1 | RES1 | 0.0000 |
| 29 | H | -2.6629 | -2.2776 | 0.7335  | H     | 1 | RES1 | 0.0000 |
| 30 | H | 1.1160  | 2.8080  | -1.4254 | H     | 1 | RES1 | 0.0000 |
| 31 | H | 2.6629  | 2.2776  | -0.7335 | H     | 1 | RES1 | 0.0000 |
| 32 | H | 1.9228  | 1.3639  | -2.0593 | H     | 1 | RES1 | 0.0000 |
| 33 | H | -1.2307 | 4.6199  | -0.0719 | H     | 1 | RES1 | 0.0000 |
| 34 | H | -1.1499 | 3.8101  | 1.5099  | H     | 1 | RES1 | 0.0000 |
| 35 | H | 0.2624  | 3.8284  | 0.4399  | H     | 1 | RES1 | 0.0000 |
| 36 | H | -4.5222 | 2.6442  | -0.4980 | H     | 1 | RES1 | 0.0000 |
| 37 | H | -3.5506 | 4.0353  | -0.0058 | H     | 1 | RES1 | 0.0000 |
| 38 | H | -3.2975 | 3.3008  | -1.6049 | H     | 1 | RES1 | 0.0000 |
| 39 | C | 5.1417  | -0.3175 | -0.8764 | C.2   | 1 | RES1 | 0.0000 |
| 40 | C | 6.3662  | 0.3320  | -0.7968 | C.2   | 1 | RES1 | 0.0000 |

|    |   |         |         |         |     |   |      |        |
|----|---|---------|---------|---------|-----|---|------|--------|
| 41 | C | 6.5669  | 1.3219  | 0.1553  | C.2 | 1 | RES1 | 0.0000 |
| 42 | C | 5.5352  | 1.6614  | 1.0208  | C.2 | 1 | RES1 | 0.0000 |
| 43 | C | 4.3102  | 1.0161  | 0.9287  | C.2 | 1 | RES1 | 0.0000 |
| 44 | H | 4.9972  | -1.0891 | -1.6266 | H   | 1 | RES1 | 0.0000 |
| 45 | H | 7.1663  | 0.0649  | -1.4792 | H   | 1 | RES1 | 0.0000 |
| 46 | H | 7.5238  | 1.8285  | 0.2220  | H   | 1 | RES1 | 0.0000 |
| 47 | H | 5.6863  | 2.4325  | 1.7690  | H   | 1 | RES1 | 0.0000 |
| 48 | H | 3.5091  | 1.2956  | 1.6066  | H   | 1 | RES1 | 0.0000 |
| 49 | C | -5.1417 | 0.3175  | 0.8764  | C.2 | 1 | RES1 | 0.0000 |
| 50 | C | -6.3662 | -0.3320 | 0.7968  | C.2 | 1 | RES1 | 0.0000 |
| 51 | C | -6.5669 | -1.3219 | -0.1553 | C.2 | 1 | RES1 | 0.0000 |
| 52 | C | -5.5352 | -1.6614 | -1.0208 | C.2 | 1 | RES1 | 0.0000 |
| 53 | C | -4.3102 | -1.0161 | -0.9287 | C.2 | 1 | RES1 | 0.0000 |
| 54 | H | -4.9972 | 1.0891  | 1.6266  | H   | 1 | RES1 | 0.0000 |
| 55 | H | -7.1663 | -0.0649 | 1.4792  | H   | 1 | RES1 | 0.0000 |
| 56 | H | -7.5238 | -1.8285 | -0.2220 | H   | 1 | RES1 | 0.0000 |
| 57 | H | -5.6863 | -2.4325 | -1.7690 | H   | 1 | RES1 | 0.0000 |
| 58 | H | -3.5091 | -1.2956 | -1.6066 | H   | 1 | RES1 | 0.0000 |

@<TRIPOS>BOND

|    |    |    |   |
|----|----|----|---|
| 1  | 1  | 2  | 1 |
| 2  | 1  | 30 | 1 |
| 3  | 1  | 31 | 1 |
| 4  | 1  | 32 | 1 |
| 5  | 2  | 3  | 1 |
| 6  | 2  | 7  | 1 |
| 7  | 3  | 4  | 1 |
| 8  | 3  | 14 | 1 |
| 9  | 4  | 5  | 1 |
| 10 | 4  | 17 | 1 |
| 11 | 5  | 6  | 1 |
| 12 | 5  | 10 | 1 |
| 13 | 6  | 27 | 1 |
| 14 | 6  | 28 | 1 |
| 15 | 6  | 29 | 1 |
| 16 | 7  | 8  | 1 |
| 17 | 7  | 10 | 1 |
| 18 | 8  | 9  | 1 |
| 19 | 8  | 12 | 1 |
| 20 | 9  | 33 | 1 |
| 21 | 9  | 34 | 1 |
| 22 | 9  | 35 | 1 |
| 23 | 10 | 11 | 1 |
| 24 | 11 | 12 | 1 |
| 25 | 11 | 19 | 1 |
| 26 | 12 | 13 | 1 |
| 27 | 13 | 36 | 1 |
| 28 | 13 | 37 | 1 |
| 29 | 13 | 38 | 1 |
| 30 | 14 | 15 | 1 |
| 31 | 14 | 20 | 1 |



32 15 16 1  
33 15 17 1  
34 16 21 1  
35 16 22 1  
36 16 23 1  
37 17 18 1  
38 18 24 1  
39 18 25 1  
40 18 26 1  
41 19 49 1  
42 19 53 1  
43 20 39 1  
44 20 43 1  
45 39 40 1  
46 39 44 1  
47 40 41 1  
48 40 45 1  
49 41 42 1  
50 41 46 1  
51 42 43 1  
52 42 47 1  
53 43 48 1  
54 49 50 1  
55 49 54 1  
56 50 51 1  
57 50 55 1  
58 51 52 1  
59 51 56 1  
60 52 53 1  
61 52 57 1  
62 53 58 1

@<TRIPOS>SUBSTRUCTURE

1 RES1 1

@<TRIPOS>MOLECULE

Open-shell singlet [**4**]<sup>2+</sup>

58 62 1

SMALL

NO\_CHARGES

\*\*\*\*

\*\*\*\*

@<TRIPOS>ATOM

|   |   |         |         |        |       |   |      |        |
|---|---|---------|---------|--------|-------|---|------|--------|
| 1 | C | -3.6486 | 3.0876  | 0.1317 | C.3   | 1 | RES1 | 0.0000 |
| 2 | N | -2.5835 | 2.1092  | 0.1348 | N.pl3 | 1 | RES1 | 0.0000 |
| 3 | N | -1.2960 | 2.4929  | 0.1108 | N.pl3 | 1 | RES1 | 0.0000 |
| 4 | C | -0.9475 | 3.8970  | 0.2064 | C.3   | 1 | RES1 | 0.0000 |
| 5 | B | -2.7408 | 0.6357  | 0.1096 | B     | 1 | RES1 | 0.0000 |
| 6 | N | -1.3909 | 0.1565  | 0.1063 | N.pl3 | 1 | RES1 | 0.0000 |
| 7 | N | -0.9054 | -1.1413 | 0.1389 | N.3   | 1 | RES1 | 0.0000 |

|    |   |         |         |         |       |   |      |        |
|----|---|---------|---------|---------|-------|---|------|--------|
| 8  | C | -1.8598 | -2.1757 | 0.4990  | C.3   | 1 | RES1 | 0.0000 |
| 9  | B | -0.4759 | 1.2862  | 0.0321  | B     | 1 | RES1 | 0.0000 |
| 10 | N | 0.9054  | 1.1413  | -0.1389 | N.3   | 1 | RES1 | 0.0000 |
| 11 | C | 1.8598  | 2.1757  | -0.4990 | C.3   | 1 | RES1 | 0.0000 |
| 12 | N | 1.3909  | -0.1565 | -0.1063 | N.pl3 | 1 | RES1 | 0.0000 |
| 13 | B | 0.4759  | -1.2862 | -0.0321 | B     | 1 | RES1 | 0.0000 |
| 14 | N | 1.2960  | -2.4929 | -0.1108 | N.pl3 | 1 | RES1 | 0.0000 |
| 15 | N | 2.5835  | -2.1092 | -0.1348 | N.pl3 | 1 | RES1 | 0.0000 |
| 16 | C | 3.6486  | -3.0876 | -0.1317 | C.3   | 1 | RES1 | 0.0000 |
| 17 | B | 2.7408  | -0.6357 | -0.1096 | B     | 1 | RES1 | 0.0000 |
| 18 | C | 0.9475  | -3.8970 | -0.2064 | C.3   | 1 | RES1 | 0.0000 |
| 19 | C | -4.1206 | -0.0509 | 0.0370  | C.2   | 1 | RES1 | 0.0000 |
| 20 | C | 4.1206  | 0.0509  | -0.0370 | C.2   | 1 | RES1 | 0.0000 |
| 21 | H | 4.5810  | -2.5485 | 0.0177  | H     | 1 | RES1 | 0.0000 |
| 22 | H | 3.5127  | -3.8074 | 0.6781  | H     | 1 | RES1 | 0.0000 |
| 23 | H | 3.6985  | -3.6194 | -1.0865 | H     | 1 | RES1 | 0.0000 |
| 24 | H | 1.0275  | -4.3952 | 0.7643  | H     | 1 | RES1 | 0.0000 |
| 25 | H | -0.0707 | -3.9829 | -0.5752 | H     | 1 | RES1 | 0.0000 |
| 26 | H | 1.6008  | -4.3990 | -0.9191 | H     | 1 | RES1 | 0.0000 |
| 27 | H | -1.3202 | -3.0672 | 0.8040  | H     | 1 | RES1 | 0.0000 |
| 28 | H | -2.4569 | -1.8354 | 1.3460  | H     | 1 | RES1 | 0.0000 |
| 29 | H | -2.5336 | -2.4088 | -0.3270 | H     | 1 | RES1 | 0.0000 |
| 30 | H | 1.3202  | 3.0672  | -0.8040 | H     | 1 | RES1 | 0.0000 |
| 31 | H | 2.5336  | 2.4088  | 0.3270  | H     | 1 | RES1 | 0.0000 |
| 32 | H | 2.4569  | 1.8354  | -1.3460 | H     | 1 | RES1 | 0.0000 |
| 33 | H | -1.0275 | 4.3952  | -0.7643 | H     | 1 | RES1 | 0.0000 |
| 34 | H | -1.6008 | 4.3990  | 0.9191  | H     | 1 | RES1 | 0.0000 |
| 35 | H | 0.0707  | 3.9829  | 0.5752  | H     | 1 | RES1 | 0.0000 |
| 36 | H | -4.5810 | 2.5485  | -0.0177 | H     | 1 | RES1 | 0.0000 |
| 37 | H | -3.6985 | 3.6194  | 1.0865  | H     | 1 | RES1 | 0.0000 |
| 38 | H | -3.5127 | 3.8074  | -0.6781 | H     | 1 | RES1 | 0.0000 |
| 39 | C | -4.5012 | -0.7608 | -1.1105 | C.2   | 1 | RES1 | 0.0000 |
| 40 | C | -5.7579 | -1.3394 | -1.2025 | C.2   | 1 | RES1 | 0.0000 |
| 41 | C | -6.6516 | -1.2296 | -0.1452 | C.2   | 1 | RES1 | 0.0000 |
| 42 | C | -6.2924 | -0.5307 | 1.0000  | C.2   | 1 | RES1 | 0.0000 |
| 43 | C | -5.0423 | 0.0634  | 1.0867  | C.2   | 1 | RES1 | 0.0000 |
| 44 | H | -3.8204 | -0.8451 | -1.9530 | H     | 1 | RES1 | 0.0000 |
| 45 | H | -6.0438 | -1.8725 | -2.1019 | H     | 1 | RES1 | 0.0000 |
| 46 | H | -7.6326 | -1.6852 | -0.2156 | H     | 1 | RES1 | 0.0000 |
| 47 | H | -6.9898 | -0.4456 | 1.8254  | H     | 1 | RES1 | 0.0000 |
| 48 | H | -4.7809 | 0.6056  | 1.9911  | H     | 1 | RES1 | 0.0000 |
| 49 | C | 4.5012  | 0.7608  | 1.1105  | C.2   | 1 | RES1 | 0.0000 |
| 50 | C | 5.7579  | 1.3394  | 1.2025  | C.2   | 1 | RES1 | 0.0000 |
| 51 | C | 6.6516  | 1.2296  | 0.1452  | C.2   | 1 | RES1 | 0.0000 |
| 52 | C | 6.2924  | 0.5307  | -1.0000 | C.2   | 1 | RES1 | 0.0000 |
| 53 | C | 5.0423  | -0.0634 | -1.0867 | C.2   | 1 | RES1 | 0.0000 |
| 54 | H | 3.8204  | 0.8451  | 1.9530  | H     | 1 | RES1 | 0.0000 |
| 55 | H | 6.0438  | 1.8725  | 2.1019  | H     | 1 | RES1 | 0.0000 |
| 56 | H | 7.6326  | 1.6852  | 0.2156  | H     | 1 | RES1 | 0.0000 |
| 57 | H | 6.9898  | 0.4456  | -1.8254 | H     | 1 | RES1 | 0.0000 |

58 H 4.7809 -0.6056 -1.9911 H 1 RES1 0.0000

@<TRIPOS>BOND

|    |    |    |   |
|----|----|----|---|
| 1  | 1  | 2  | 1 |
| 2  | 1  | 36 | 1 |
| 3  | 1  | 37 | 1 |
| 4  | 1  | 38 | 1 |
| 5  | 2  | 3  | 1 |
| 6  | 2  | 5  | 1 |
| 7  | 3  | 4  | 1 |
| 8  | 3  | 9  | 1 |
| 9  | 4  | 33 | 1 |
| 10 | 4  | 34 | 1 |
| 11 | 4  | 35 | 1 |
| 12 | 5  | 6  | 1 |
| 13 | 5  | 19 | 1 |
| 14 | 6  | 7  | 1 |
| 15 | 6  | 9  | 1 |
| 16 | 7  | 8  | 1 |
| 17 | 7  | 13 | 1 |
| 18 | 8  | 27 | 1 |
| 19 | 8  | 28 | 1 |
| 20 | 8  | 29 | 1 |
| 21 | 9  | 10 | 1 |
| 22 | 10 | 11 | 1 |
| 23 | 10 | 12 | 1 |
| 24 | 11 | 30 | 1 |
| 25 | 11 | 31 | 1 |
| 26 | 11 | 32 | 1 |
| 27 | 12 | 13 | 1 |
| 28 | 12 | 17 | 1 |
| 29 | 13 | 14 | 1 |
| 30 | 14 | 15 | 1 |
| 31 | 14 | 18 | 1 |
| 32 | 15 | 16 | 1 |
| 33 | 15 | 17 | 1 |
| 34 | 16 | 21 | 1 |
| 35 | 16 | 22 | 1 |
| 36 | 16 | 23 | 1 |
| 37 | 17 | 20 | 1 |
| 38 | 18 | 24 | 1 |
| 39 | 18 | 25 | 1 |
| 40 | 18 | 26 | 1 |
| 41 | 19 | 39 | 1 |
| 42 | 19 | 43 | 1 |
| 43 | 20 | 49 | 1 |
| 44 | 20 | 53 | 1 |
| 45 | 39 | 40 | 1 |
| 46 | 39 | 44 | 1 |
| 47 | 40 | 41 | 1 |
| 48 | 40 | 45 | 1 |

49 41 42 1  
50 41 46 1  
51 42 43 1  
52 42 47 1  
53 43 48 1  
54 49 50 1  
55 49 54 1  
56 50 51 1  
57 50 55 1  
58 51 52 1  
59 51 56 1  
60 52 53 1  
61 52 57 1  
62 53 58 1

@<TRIPOS>SUBSTRUCTURE

1 RES1 1

@<TRIPOS>MOLECULE

Triplet [4]<sup>2+</sup>

58 62 1

SMALL

NO\_CHARGES

\*\*\*\*

\*\*\*\*

@<TRIPOS>ATOM

|    |   |         |         |         |       |   |      |        |
|----|---|---------|---------|---------|-------|---|------|--------|
| 1  | C | -3.6448 | 3.1011  | 0.1787  | C.3   | 1 | RES1 | 0.0000 |
| 2  | N | -2.5848 | 2.1173  | 0.1690  | N.pl3 | 1 | RES1 | 0.0000 |
| 3  | N | -1.2975 | 2.4914  | 0.1390  | N.pl3 | 1 | RES1 | 0.0000 |
| 4  | C | -0.9377 | 3.8911  | 0.2485  | C.3   | 1 | RES1 | 0.0000 |
| 5  | B | -2.7382 | 0.6373  | 0.1261  | B     | 1 | RES1 | 0.0000 |
| 6  | N | -1.3884 | 0.1585  | 0.1233  | N.pl3 | 1 | RES1 | 0.0000 |
| 7  | N | -0.9051 | -1.1465 | 0.1452  | N.3   | 1 | RES1 | 0.0000 |
| 8  | C | -1.8426 | -2.1747 | 0.5639  | C.3   | 1 | RES1 | 0.0000 |
| 9  | B | -0.4753 | 1.2821  | 0.0457  | B     | 1 | RES1 | 0.0000 |
| 10 | N | 0.9051  | 1.1465  | -0.1452 | N.3   | 1 | RES1 | 0.0000 |
| 11 | C | 1.8426  | 2.1747  | -0.5639 | C.3   | 1 | RES1 | 0.0000 |
| 12 | N | 1.3884  | -0.1585 | -0.1233 | N.pl3 | 1 | RES1 | 0.0000 |
| 13 | B | 0.4753  | -1.2821 | -0.0457 | B     | 1 | RES1 | 0.0000 |
| 14 | N | 1.2975  | -2.4914 | -0.1390 | N.pl3 | 1 | RES1 | 0.0000 |
| 15 | N | 2.5848  | -2.1173 | -0.1690 | N.pl3 | 1 | RES1 | 0.0000 |
| 16 | C | 3.6448  | -3.1011 | -0.1787 | C.3   | 1 | RES1 | 0.0000 |
| 17 | B | 2.7382  | -0.6373 | -0.1261 | B     | 1 | RES1 | 0.0000 |
| 18 | C | 0.9377  | -3.8911 | -0.2485 | C.3   | 1 | RES1 | 0.0000 |
| 19 | C | -4.1142 | -0.0495 | 0.0379  | C.2   | 1 | RES1 | 0.0000 |
| 20 | C | 4.1142  | 0.0495  | -0.0379 | C.2   | 1 | RES1 | 0.0000 |
| 21 | H | 4.5806  | -2.5687 | -0.0274 | H     | 1 | RES1 | 0.0000 |
| 22 | H | 3.5095  | -3.8266 | 0.6261  | H     | 1 | RES1 | 0.0000 |
| 23 | H | 3.6884  | -3.6257 | -1.1377 | H     | 1 | RES1 | 0.0000 |
| 24 | H | 1.0426  | -4.4047 | 0.7119  | H     | 1 | RES1 | 0.0000 |

|    |   |         |         |         |     |   |      |        |
|----|---|---------|---------|---------|-----|---|------|--------|
| 25 | H | -0.0922 | -3.9634 | -0.5866 | H   | 1 | RES1 | 0.0000 |
| 26 | H | 1.5682  | -4.3851 | -0.9872 | H   | 1 | RES1 | 0.0000 |
| 27 | H | -1.2886 | -3.0526 | 0.8841  | H   | 1 | RES1 | 0.0000 |
| 28 | H | -2.4177 | -1.8120 | 1.4171  | H   | 1 | RES1 | 0.0000 |
| 29 | H | -2.5374 | -2.4421 | -0.2332 | H   | 1 | RES1 | 0.0000 |
| 30 | H | 1.2886  | 3.0526  | -0.8841 | H   | 1 | RES1 | 0.0000 |
| 31 | H | 2.5374  | 2.4421  | 0.2332  | H   | 1 | RES1 | 0.0000 |
| 32 | H | 2.4177  | 1.8120  | -1.4171 | H   | 1 | RES1 | 0.0000 |
| 33 | H | -1.0426 | 4.4047  | -0.7119 | H   | 1 | RES1 | 0.0000 |
| 34 | H | -1.5682 | 4.3851  | 0.9872  | H   | 1 | RES1 | 0.0000 |
| 35 | H | 0.0922  | 3.9634  | 0.5866  | H   | 1 | RES1 | 0.0000 |
| 36 | H | -4.5806 | 2.5687  | 0.0274  | H   | 1 | RES1 | 0.0000 |
| 37 | H | -3.6884 | 3.6257  | 1.1377  | H   | 1 | RES1 | 0.0000 |
| 38 | H | -3.5095 | 3.8266  | -0.6261 | H   | 1 | RES1 | 0.0000 |
| 39 | C | -4.4603 | -0.8059 | -1.0912 | C.2 | 1 | RES1 | 0.0000 |
| 40 | C | -5.7150 | -1.3849 | -1.1998 | C.2 | 1 | RES1 | 0.0000 |
| 41 | C | -6.6405 | -1.2333 | -0.1752 | C.2 | 1 | RES1 | 0.0000 |
| 42 | C | -6.3155 | -0.4904 | 0.9527  | C.2 | 1 | RES1 | 0.0000 |
| 43 | C | -5.0690 | 0.1079  | 1.0530  | C.2 | 1 | RES1 | 0.0000 |
| 44 | H | -3.7540 | -0.9236 | -1.9081 | H   | 1 | RES1 | 0.0000 |
| 45 | H | -5.9749 | -1.9517 | -2.0864 | H   | 1 | RES1 | 0.0000 |
| 46 | H | -7.6197 | -1.6908 | -0.2579 | H   | 1 | RES1 | 0.0000 |
| 47 | H | -7.0372 | -0.3739 | 1.7528  | H   | 1 | RES1 | 0.0000 |
| 48 | H | -4.8346 | 0.6841  | 1.9436  | H   | 1 | RES1 | 0.0000 |
| 49 | C | 4.4603  | 0.8059  | 1.0912  | C.2 | 1 | RES1 | 0.0000 |
| 50 | C | 5.7150  | 1.3849  | 1.1998  | C.2 | 1 | RES1 | 0.0000 |
| 51 | C | 6.6405  | 1.2333  | 0.1752  | C.2 | 1 | RES1 | 0.0000 |
| 52 | C | 6.3155  | 0.4904  | -0.9527 | C.2 | 1 | RES1 | 0.0000 |
| 53 | C | 5.0690  | -0.1079 | -1.0530 | C.2 | 1 | RES1 | 0.0000 |
| 54 | H | 3.7540  | 0.9236  | 1.9081  | H   | 1 | RES1 | 0.0000 |
| 55 | H | 5.9749  | 1.9517  | 2.0864  | H   | 1 | RES1 | 0.0000 |
| 56 | H | 7.6197  | 1.6908  | 0.2579  | H   | 1 | RES1 | 0.0000 |
| 57 | H | 7.0372  | 0.3739  | -1.7528 | H   | 1 | RES1 | 0.0000 |
| 58 | H | 4.8346  | -0.6841 | -1.9436 | H   | 1 | RES1 | 0.0000 |

@<TRIPOS>BOND

|    |   |    |   |
|----|---|----|---|
| 1  | 1 | 2  | 1 |
| 2  | 1 | 36 | 1 |
| 3  | 1 | 37 | 1 |
| 4  | 1 | 38 | 1 |
| 5  | 2 | 3  | 1 |
| 6  | 2 | 5  | 1 |
| 7  | 3 | 4  | 1 |
| 8  | 3 | 9  | 1 |
| 9  | 4 | 33 | 1 |
| 10 | 4 | 34 | 1 |
| 11 | 4 | 35 | 1 |
| 12 | 5 | 6  | 1 |
| 13 | 5 | 19 | 1 |
| 14 | 6 | 7  | 1 |
| 15 | 6 | 9  | 1 |

|    |    |    |   |
|----|----|----|---|
| 16 | 7  | 8  | 1 |
| 17 | 7  | 13 | 1 |
| 18 | 8  | 27 | 1 |
| 19 | 8  | 28 | 1 |
| 20 | 8  | 29 | 1 |
| 21 | 9  | 10 | 1 |
| 22 | 10 | 11 | 1 |
| 23 | 10 | 12 | 1 |
| 24 | 11 | 30 | 1 |
| 25 | 11 | 31 | 1 |
| 26 | 11 | 32 | 1 |
| 27 | 12 | 13 | 1 |
| 28 | 12 | 17 | 1 |
| 29 | 13 | 14 | 1 |
| 30 | 14 | 15 | 1 |
| 31 | 14 | 18 | 1 |
| 32 | 15 | 16 | 1 |
| 33 | 15 | 17 | 1 |
| 34 | 16 | 21 | 1 |
| 35 | 16 | 22 | 1 |
| 36 | 16 | 23 | 1 |
| 37 | 17 | 20 | 1 |
| 38 | 18 | 24 | 1 |
| 39 | 18 | 25 | 1 |
| 40 | 18 | 26 | 1 |
| 41 | 19 | 39 | 1 |
| 42 | 19 | 43 | 1 |
| 43 | 20 | 49 | 1 |
| 44 | 20 | 53 | 1 |
| 45 | 39 | 40 | 1 |
| 46 | 39 | 44 | 1 |
| 47 | 40 | 41 | 1 |
| 48 | 40 | 45 | 1 |
| 49 | 41 | 42 | 1 |
| 50 | 41 | 46 | 1 |
| 51 | 42 | 43 | 1 |
| 52 | 42 | 47 | 1 |
| 53 | 43 | 48 | 1 |
| 54 | 49 | 50 | 1 |
| 55 | 49 | 54 | 1 |
| 56 | 50 | 51 | 1 |
| 57 | 50 | 55 | 1 |
| 58 | 51 | 52 | 1 |
| 59 | 51 | 56 | 1 |
| 60 | 52 | 53 | 1 |
| 61 | 52 | 57 | 1 |
| 62 | 53 | 58 | 1 |

@<TRIPOS>SUBSTRUCTURE  
1 RES1 1
